# Supplementary material for: The impact of cyberbullying on adolescents: social and psychological consequences from a population demography perspective in Assiut Governorate, Egypt
Source: Frontiers journal article supplement (doi:10.3389/fhumd.2025.1519442), 2025-05-14
Supplement: Supplementary_file_1.docx [file Supplementary_file_1.docx]

Appendices

Appendix A

Table 6. Post Hoc L.S.D Comparison of Mean Differences in Victimization and Aggression Across Provinces (Markaz) in Assiut Governorate.

| **Sig.** | **Std. Error** | **Mean Difference** | **Binary comparisons** | | **Variable** |
| --- | --- | --- | --- | --- | --- |
| .05 | .65 | 1.71 | Sahel Seleem | Dayrout | Victimization |
| .05 | .51 | 1.04 | Alquseyah | Dayrout |
| .05 | .71 | 1.81 | El- Ghanayem | Dayrout |
| .05 | .63 | 1.56 | Sahel Seleem | Assiut |
| .05 | .70 | 1.67 | El- Ghanayem | Assiut |
| .05 | .67 | 1.39 | Sahel Seleem | Abu Tig |
| .05 | .74 | 1.50 | El- Ghanayem | Abu Tig |
| .05 | .63 | 1.41 | Abanoub | Sedfa |
| .05 | .64 | 1.66 | El-Fath | Sedfa |
| .01 | .74 | 2.57 | Sahel Seleem | Sedfa |
| .05 | .62 | 1.91 | Alquseyah | Sedfa |
| .05 | .63 | 1.48 | El Badary | Sedfa |
| .01 | .79 | 2.68 | El- Ghanayem | Sedfa |
| .05 | .68 | 1.34 | Assiut City | Sedfa |
| .05 | .66 | 1.67 | Manfalout | Sedfa |
| .05 | .59 | 1.18 | Abu Tig | Sedfa |
| .05 | .42 | .96 | Abu Tig | Dayrout | Aggression |
| .001 | .57 | 2.21 | Sahel Seleem | Dayrout |
| .01 | .45 | 1.39 | Alquseyah | Dayrout |
| .01 | .56 | 1.66 | Sahel Seleem | Assiut |
| .05 | .65 | 1.32 | Sahel Seleem | Manfalout |
| .05 | .59 | 1.24 | Sahel Seleem | Abu Tig |
| .01 | .48 | 1.52 | Assiut | Sedfa |
| .01 | .58 | 1.86 | Manfalout | Sedfa |
| .01 | .56 | 1.76 | Abanoub | Sedfa |
| .01 | .56 | 1.50 | El-Fath | Sedfa |
| .001 | .65 | 3.18 | Sahel Seleem | Sedfa |
| .001 | .56 | 2.36 | Alquseyah | Sedfa |
| .05 | .55 | 1.16 | El Badary | Sedfa |
| .01 | .70 | 1.82 | El- Ghanayem | Sedfa |
| .01 | .59 | 1.51 | Assiut City | Sedfa |
| .05 | .62 | 1.41 | Sahel Seleem | Abanoub |
| .01 | .62 | 1.67 | Sahel Seleem | El-Fath |

*This table presents the results of the Post Hoc L.S.D test comparing mean differences in victimization and aggression across various provinces (Markaz) in Assiut Governorate. Significant differences in victimization and aggression were identified between several province pairs, highlighting the variability in these experiences across regions.*

Appendix B

Table 7. Exploratory Factor Analysis to Cyberbullying scale

| **Extraction** | **Loadings** | **Items** |
| --- | --- | --- |
| .46 | .80 | Item 1 |
| .52 | .79 | Item 2 |
| .61 | .78 | Item 3 |
| .50 | .77 | Item 4 |
| .43 | .77 | Item 5 |
| .47 | .75 | Item 6 |
| .43 | .74 | Item 7 |
| .56 | .72 | Item 8 |
| .63 | .71 | Item 9 |
| .46 | .71 | Item 10 |
| .37 | .71 | Item 11 |
| .59 | .69 | Item 12 |
| .55 | .68 | Item 13 |
| .60 | .67 | Item 14 |
| .65 | .66 | Item 15 |
| .36 | .66 | Item 16 |
| .50 | .61 | Item 17 |
| .50 | .60 | Item 18 |
| 9.28 | | Total |
| 51.60 | | % Variance |

Exploratory Factor Analysis (EFA) results for the Cyberbullying Scale, showing factor loadings, extraction values, and the total variance explained (51.60%) by the construct.

Appendix B

Table 8. Mean and Std. Deviation of Key Variables Across Assiut Provinces.

| **Std. Deviation** | **Mean** | **Variable** |  |
| --- | --- | --- | --- |
| 9.10 | 22.44 | Cyberbullying | Abanoub |
| 6.93 | 15.45 | Victimization |
| 5.98 | 13.48 | Aggression |
| 4.66 | 17.30 | Self- Esteem |
| 11.63 | 23.50 | Cyberbullying | Abu Tig |
| 6.86 | 15.22 | Victimization |
| 6.19 | 13.66 | Aggression |
| 5.15 | 17.20 | Self- Esteem |
| 8.23 | 21.86 | Cyberbullying | El Badary |
| 7.18 | 15.52 | Victimization |
| 5.71 | 12.88 | Aggression |
| 4.75 | 17.44 | Self- Esteem |
| 10.20 | 23.66 | Cyberbullying | El-Ghanayem |
| 7.19 | 15.71 | Victimization |
| 6.54 | 13.58 | Aggression |
| 4.39 | 17.02 | Self- Esteem |
| 7.76 | 22.71 | Cyberbullying | El-Fath |
| 6.85 | 15.70 | Victimization |
| 5.53 | 13.22 | Aggression |
| 4.52 | 17.10 | Self- Esteem |
| 9.09 | 22.35 | Cyberbullying | Alquseyah |
| 7.79 | 15.95 | Victimization |
| 7.50 | 14.0845 | Aggression |
| 4.91 | 17.02 | Self- Esteem |
| 13.18 | 27.62 | Cyberbullying | Dayrout |
| 6.79 | 14.91 | Victimization |
| 5.76 | 12.69 | Aggression |
| 4.55 | 16.63 | Self- Esteem |
| 13.74 | 26.06 | Cyberbullying | Sahel Seleem |
| 5.54 | 15.61 | Victimization |
| 7.51 | 14.90 | Aggression |
| 4.92 | 17.13 | Self- Esteem |
| 13.94 | 28.54 | Cyberbullying | Sedfa |
| 7.72 | 16.04 | Victimization |
| 3.66 | 11.72 | Aggression |
| 4.35 | 15.98 | Self- Esteem |
| 5.52 | 21.88 | Cyberbullying | Assiut City |
| 6.10 | 15.38 | Victimization |
| 5.79 | 13.23 | Aggression |
| 4.90 | 17.64 | Self- Esteem |
| 10.63 | 23.08 | Cyberbullying | Assiut |
| 6.85 | 15.05 | Victimization |
| 6.01 | 13.24 | Aggression |
| 5.02 | 17.20 | Self- Esteem |
| 10.20 | 23.67 | Cyberbullying | Manfalout |
| 7.19 | 15.71 | Victimization |
| 6.54 | 13.58 | Aggression |
| 4.39 | 17.02 | Self- Esteem |

*This table presents the mean and standard deviation values for key variables—cyberbullying, victimization, aggression, and self-esteem—across different provinces (Markaz) in Assiut Governorate. The data highlights variability in these psychological and behavioral factors among the studied regions*
